# Supplementary material
Source: PubMed Central journal article supplement (PMC2713531)
Supplement: supp_M109.012096_jbc.M109.012096-1.pdf [file supp_M109.012096_jbc.M109.012096-1.pdf]

## Supplementary Figure 1

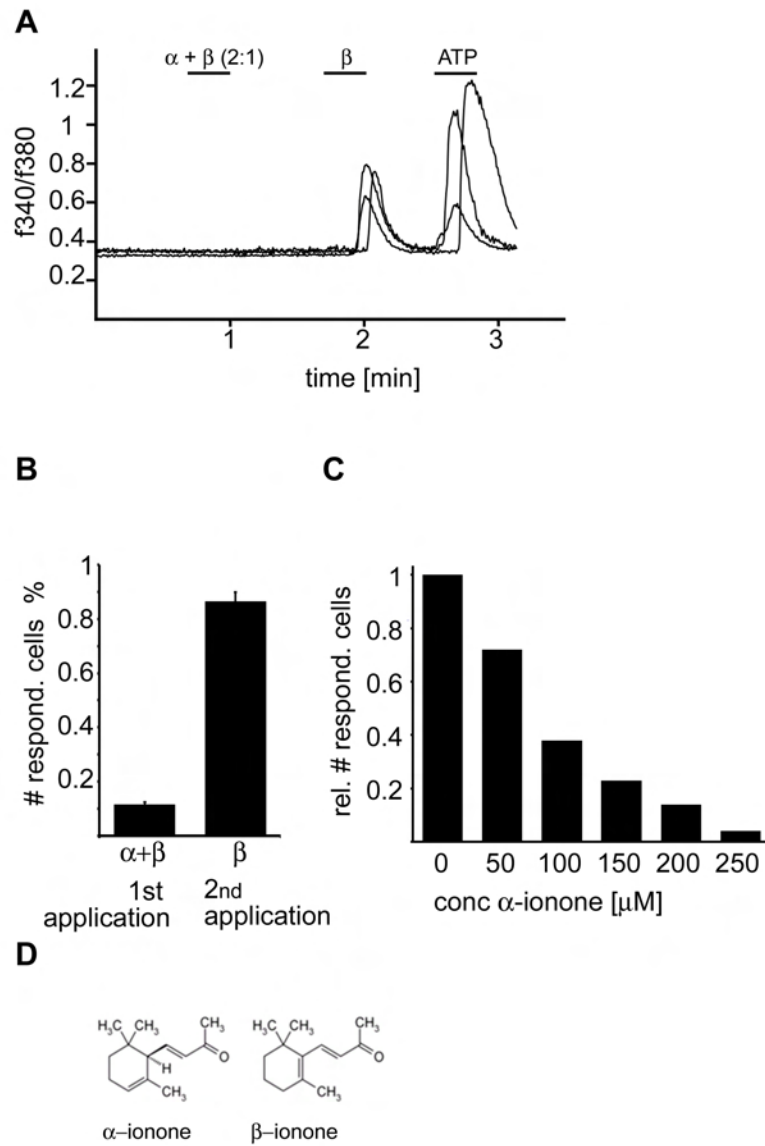

# Supplementary Figure S2

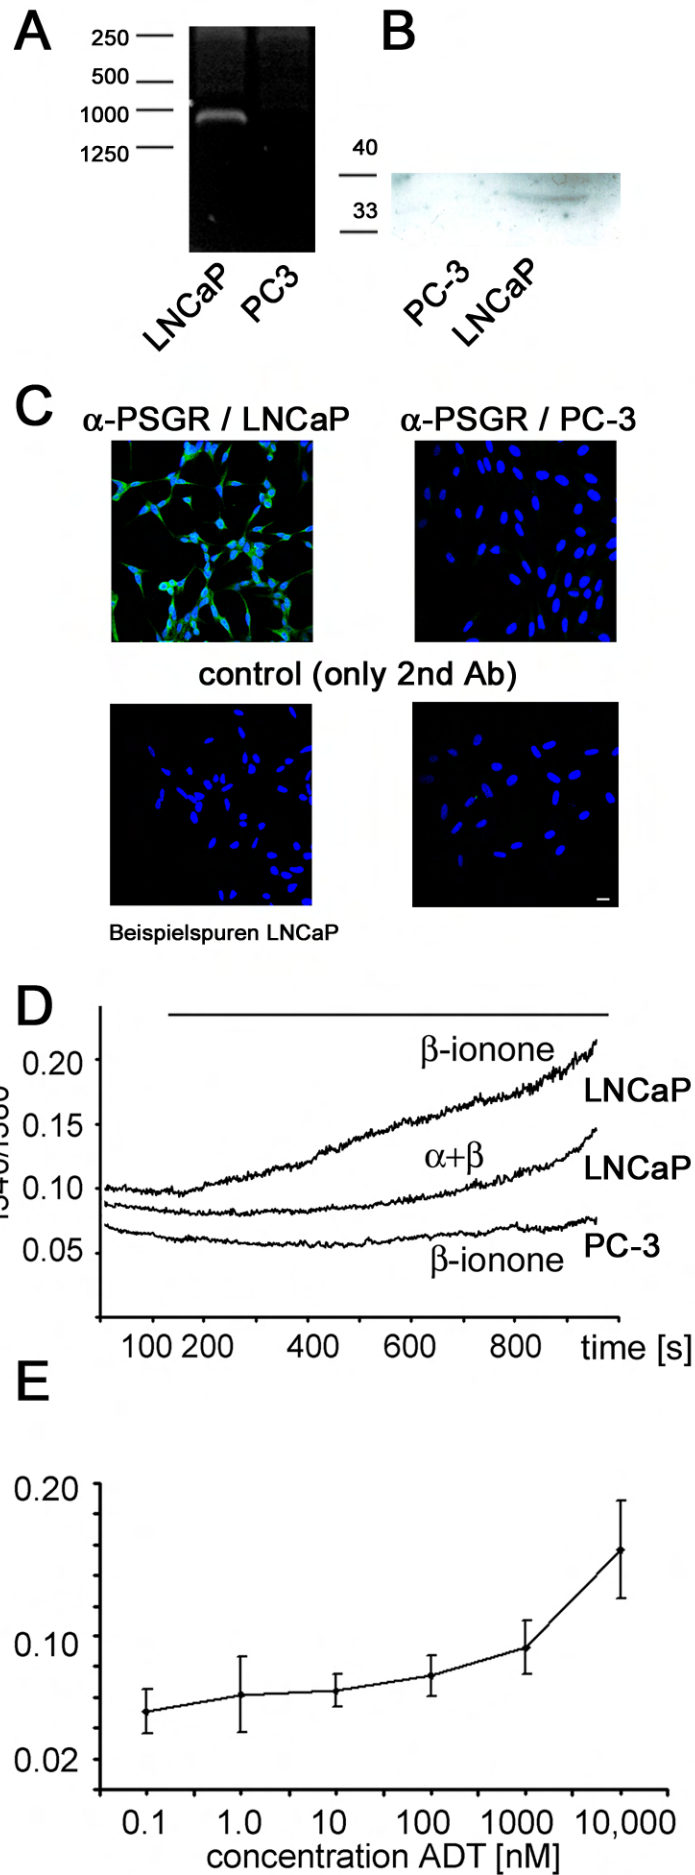

### Supplementary Figure 3

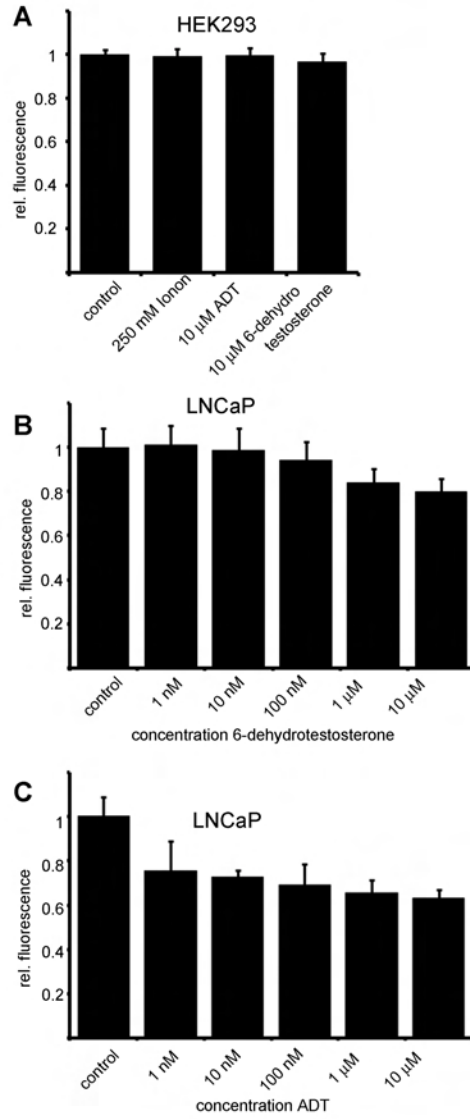

### **Supplementary Figure S1. Characterization of recombinantly expressed PSGR.**

(A) Inhibition of the  $\beta$ -ionone response of recombinantly expressed PSGR in HEK293 cells. In randomly selected fields of view, co-application of  $\alpha$ - and  $\beta$ -ionone in a mixture of 2:1 (100  $\mu$ M : 50  $\mu$ M) did not induce  $\text{Ca}^{2+}$  signals in PSGR transfected HEK293 cells, which in a second application responded to the application of  $\beta$ -ionone (50  $\mu$ M) alone. ATP (200  $\mu$ M) served as a control. The integrated fluorescence ratio (f340/f380) of fura-2 loaded cells is shown as a function of time. Substances were applied for 20 s. (B) Quantification of the observed effect. Shown is the number of cells responding to co-application of  $\alpha$ - and  $\beta$ -ionone (100  $\mu$ M : 50  $\mu$ M) compared to the number of cells responding to the following application of  $\beta$ -ionone (50  $\mu$ M) alone. (C) The inhibitory effect of  $\alpha$ -ionone was dose dependent. Co-application of increasing concentrations of  $\alpha$ -ionone caused an increased reduction of the number of cells responding to 50  $\mu$ M  $\beta$ -ionone. Shown are relative numbers of cells responding to 50  $\mu$ M  $\beta$ -ionone in the presence of varying concentrations of  $\alpha$ -ionone. (D) Structures of  $\beta$ -ionone and  $\alpha$ -ionone in comparison.

### **Supplementary Figure S2. PSGR expression and activation in prostate epithelial cells.**

(A) We investigated PSGR expression by RT-PCR in LNCaP compared to PC-3 prostate cancer cell lines using the intron spanning primers displayed in Fig. 2A. PSGR transcripts were detected in LNCaP, but not in PC-3 cells. (B) Western blot showing expression of PSGR in LNCaP cells, but not in PC-3 cells. (C) Immunohistochemical stainings of PSGR were positive in LNCaP, but found to be absent PC-3 cells, which is in agreement with the results obtained with RT-PCR and western blotting. Stainings with the secondary antibodies only is shown as control. (D) The prostate epithelial cell lines LNCaP and PC-3 were investigated for activation by the identified PSGR ligand  $\beta$ -ionone using  $\text{Ca}^{2+}$ -imaging,  $\beta$ -ionone (500  $\mu$ M) induced  $\text{Ca}^{2+}$  signals are displayed as a function of time. The integrated fluorescence ratio (f340/f380) of fura-2 loaded cells is shown as a function of time. The ligands are applied from 100s on for the entire duration of the experiment (1000s). LNCaP cells showed a slow, gradual increase in the calcium concentration, which was reduced upon co-application of  $\alpha$ -ionone in a ratio of 2:1. PC-3 cells did not show an increase in the calcium concentration upon application of 500  $\mu$ M  $\beta$ -ionone. (E) The prostate epithelial cell line LNCaP was investigated for activation by different concentrations of the identified PSGR ligand ADT using ratiometric  $\text{Ca}^{2+}$ -imaging. As in the other experiments, the ligand was applied

from 100s on for the entire duration of the experiment (1000s). ADT induced  $\text{Ca}^{2+}$  signals in LNCaP cells were quantified from 5 independent experiments,  $n > 30$  cells were analyzed for each concentration.

**Supplementary Figure S3. Activation of PSGR in LNCaP cells reduces cell proliferation.**

(A) Proliferation of HEK293 cells is not affected by application of 250  $\mu\text{M}$   $\beta$ -ionone, 10  $\mu\text{M}$  ADT, or 10 $\mu\text{M}$  6-dehydrotestosterone for 3 days. (B) LNCaP cells were treated with different concentrations of 6-dehydrotestosterone for 3 days. The effect on cell proliferation was stronger, when the steroid concentration was increased. (C) The same experiments were performed with the ADT as ligand. ADT was effective in reducing cell proliferation already at lower concentrations than 6-dehydrotestosterone. The experiments were repeated 6 times, \* $p < 0.05$ ; \*\* $p < 0.01$ .
